# Supplementary material for: Primary Care Continuity, Frequency, and Regularity Associated With Medicare Savings
Source: PubMed Central journal article supplement (PMC10442711; doi:10.1001/jamanetworkopen.2023.29991), 2023-08-21
Supplement: jamanetwopen-e2329991-s003.pdf [file jamanetwopen-e2329991-s003.pdf]

## Data Sharing Statement

Sonmez. Primary Care Continuity, Frequency, and Regularity Associated With Medicare Savings. *JAMA Netw Open*. Published August 21, 2023.

doi:10.1001/jamanetworkopen.2023.29991

### Data

**Data available:** Yes

**Data types:** Deidentified participant data, Data dictionary

**How to access data:** <https://www.cms.gov/research-statistics-data-and-systems/files-for-order/limiteddatasets>

**When available:** With publication

### Supporting Documents

**Document types:** None

### Additional Information

**Who can access the data:** researchers as allowed by federal laws and regulations as well as CMS policy.

**Types of analyses:** for a specified purpose

**Mechanisms of data availability:** with a signed data access agreement
